# Supplementary material for: The kinetochore prevents centromere-proximal crossover recombination during meiosis
Source: eLife. 2015 Dec 14;4:e10850. doi: 10.7554/eLife.10850 (PMC4749563; doi:10.7554/eLife.10850)
Supplement: Supplementary file 1. — DOI: http://dx.doi.org/10.7554/eLife.10850.019 [file elife-10850-supp1.xlsx]

## Sheet: General overview
		4 blue spores				Other		Fisher's exact test (comparing 'no recombination' to 'recombination')
		No Recombination	Recombination		Total									Tetrads to analyse to obtain power=0.95	Tetrads to analyse to obtain power=0.80
			Nonparental ditype	Tetratype						Morgans	SE		Current power
	WT	2815	0	23	2838	18		x		0.0041	0.000842		x	x	x
	iml3Δ	192	1	19	212	312		< 0.0001		0.059	0.017016		1
	chl4Δ	302	2	36	340	386		< 0.0001		0.0706	0.014796		1
	ctf19Δ	153	1	26	180	574		< 0.0001		0.0889	0.020845		1
	mcm21Δ	118	1	18	137	412		< 0.0001		0.0876	0.025754		1
	zip1Δ	279	0	12	291	146		< 0.0001		0.0206	0.005828		0.96
	Zip1-S75E	452	0	6	458	29		0.2798		0.0066	0.002657		0.18	11701	7227
	scc4-m35	468	0	24	492	273		< 0.0001		0.0244	0.004856		1
	Scc4	605	0	6	611	8		0.6278		0.0049	0.001995		0.07	71860	43840
	iml3-mn	3297	0	115	3412	369		< 0.0001		0.0169	0.001545		1
	nkp1Δ	1021	0	31	1052	55		< 0.0001		0.0147	0.002607		0.99
	nkp2Δ	1142	0	43	1185	137		< 0.0001		0.0181	0.002716		1
	cnn1Δ	1011	1	36	1048	171		< 0.0001		0.02	0.004001		1
	mhf1Δ	208	0	2	210	10		0.4121		0.0048	0.003351		0.05	117082	71280
	mhf2Δ	273	0	4	277	10		0.2947		0.0072	0.003584		0.18	8492	5261
	mph1Δ	195	0	3	198	9		0.2383		0.0076	0.004341		0.18	6516	3969
	wip1Δ	912	0	38	950	203		< 0.0001		0.02	0.003179		1
										"Morgans" and "SE" determined using tool provided on: http://molbio.uoregon.edu/~fstahl/compare2.php
														ww.st
		4 blue spores				Other		Fisher's exact test (comparing 'no recombination' to 'recombination')
		No Recombination	Recombination		Total									Tetrads to analyse to obtain power=0.95	Tetrads to analyse to obtain power=0.80
			Nonparental ditype	Tetratype						Morgans	SE		Current power
	Ctf19-FRB (DMSO)	1270	0	12	1282	45		x		0.0047	0.001345		x	x	x
	Ctf19-FRB (RAP_0hr)	96	0	14	110	74		< 0.0001		0.0636	0.015888		1
	Ctf19-FRB (RAP_3hr)	1693	0	42	1735	158		0.0021		0.0121	0.001845		0.87
		4 blue spores				Other		Fisher's exact test (comparing 'no recombination' to 'recombination')
		No Recombination	Recombination		Total									Tetrads to analyse to obtain power=0.95	Tetrads to analyse to obtain power=0.80
			Nonparental ditype	Tetratype						Morgans	SE		Current power
	Ctf19-FRB (DMSO)	1270	0	12	1282	45		< 0.0001		0.0047	0.001345		1
	Ctf19-FRB (RAP_0hr)	96	0	14	110	74		x		0.0636	0.015888		x	x	x
	Ctf19-FRB (RAP_3hr)	1693	0	42	1735	158		< 0.0001		0.0121	0.001845		0.99
		4 blue spores				Other		Fisher's exact test (comparing 'no recombination' to 'recombination')
		No Recombination	Recombination		Total									Tetrads to analyse to obtain power=0.95	Tetrads to analyse to obtain power=0.80
			Nonparental ditype	Tetratype						Morgans	SE		Current power
	zip1Δ	279	0	12	291	146		x		0.0206	0.005828		x	x	x
	scc4-m35	468	0	24	492	273		0.7253		0.0244	0.004856		0.06	17698	10789

## Sheet: WT
						2815								23								1
																						2
						1																2
						3																2
																						1
																						6

## Sheet: iml3d
						192								19								5								1								3								1
																						21								1								2								1
						41								5								25								7								1								2
						67								3								1								4								1								1
						21								1								1								1								3								2
						54																2								1								3								5
						6																2								2								4								1

## Sheet: chl4d
						302								36								1								2								2								1
																						79								1								31								2
						23								2								1								4								7								1
						56								5								15								5								4								1
						13								3								2								3								1								2
						43																42								12								1								1
						4																1								2								2								1

## Sheet: ctf19d
						153								26								37								26								3								5
																						10								1								4								1
						26								6								61								17								1								2
						51								7								6								7								7								13
						17								3								42								3								1								3
						69																35								2								19								2
						9																1								1								10								1

## Sheet: mcm21d
						118								18								19								1								10								1
																						1								3								3								1
						22								8								2								49								1								23
						45								2								7								1								1								1
						18								2								35								2								1								1
						64																17								1								2								1
						29																1								1								1								1

## Sheet: zip1d
						279								12								20								1								2
																						8								1								1
						11								1								1								4								1
						18								2								5								1								1
						16								1								2								1								1
						40																2								1								1
																						1								2

## Sheet: Zip1-S75E
						452								6								4
																						1
						1																1
						6																1
						1																13
						1

## Sheet: scc4-m35
						468								24								4								1								1
																						6								1								1
						37								7								4								2								11
						40								3								6								2								1
						29								3								45								1								2
						39																14								1
						2																1								9

## Sheet: Scc4
						605								6								1
																						7
						1
						4
						3

[truncated: 11 more sheets: iml3-mn, nkp1d, nkp2d, cnn1d, mhf1d, mhf2d, mph1d, wip1d, Ctf19-FRB (DMSO), Ctf19-FRB (RAP_0hr), Ctf19-FRB (RAP_3hr)]
