# Supplementary material for: The kinetochore prevents centromere-proximal crossover recombination during meiosis
Source: eLife. 2015 Dec 14;4:e10850. doi: 10.7554/eLife.10850 (PMC4749563; doi:10.7554/eLife.10850)
Supplement: Supplementary file 2. — DOI: http://dx.doi.org/10.7554/eLife.10850.020 [file elife-10850-supp2.xlsx]

## Sheet: General overview
		4 blue spores				Other		Fisher's exact test (comparing 'no recombination' to 'recombination')
		No Recombination	Recombination		Total									Tetrads to analyse to obtain power=0.95	Tetrads to analyse to obtain power=0.80
			Nonparental ditype	Tetratype						Morgans	SE		Current power
	WT	3344	0	587	3931	14		x		0.0747	0.002842		x	x	x
	iml3Δ	175	0	35	210	283		0.4879		0.0833	0.012859		0.12	8830	5373
	chl4Δ	268	0	53	321	267		0.4648		0.0826	0.010361		0.11	15458	9390
	ctf19Δ	129	1	26	156	235		0.4234		0.1026	0.023864		0.1	8830	5373
	mcm21Δ	183	0	36	219	208		0.5595		0.0822	0.012522		0.07	34237	20759
	zip1Δ	440	2	46	488	181		0.002		0.0594	0.0108		0.9
	Zip1-S75E	170	0	33	203	14		0.6141		0.0813	0.012948		0.07	34237	20759
	scc4-m35	747	0	123	870	480		0.5977		0.0707	0.005906		0.11	32418	19660
	Scc4	812	0	137	949	5		0.722		0.0722	0.005704		0.06	131118	79354
	iml3-mn	662	0	116	778	82		1		0.0746	0.006385		0.05	3306545	1997960
	cnn1Δ	756	0	117	873	109		0.2666		0.067	0.005765		0.19	14245	8657
	nkp1Δ	637	0	111	748	49		1		0.0742	0.006499		0.05	824855	498613
										"Morgans" and "SE" determined using tool provided on: http://molbio.uoregon.edu/~fstahl/compare2.php

## Sheet: WT
						3344								587								3
																						5
																						2
																						2
						2

## Sheet: iml3d
						175								37								2								4								4
																						1								10								4
						29								4								6								6								2
						45								2								7								2
						16								3								3								56
						32																4								2
						3																32								4

## Sheet: chl4d
						268								53								8								6								1
																						1								11								2
						36								5								1								10								4
						87								2								2								1
						20								2								4								2
						49																1								1
						7																3								1

## Sheet: ctf19d
						129								26								2								3								2
																						13								3								2
						26								5								5								1								4
						45								3								4								3
						6								2								3								6
						61																8								7
						18																1								3

## Sheet: mcm21d
						183								36								18								4								1
																						4								3								1
						25								5								1								8
						52								1								15								1
						9								3								1								5
						42																1								2
						4																1								1

## Sheet: zip1d
						440								46								38
																						10
						5								2								4
						4								1								3
						6								1								1
						100																5
						1																2

## Sheet: Zip1-S75E
						170								33								3
																						6
																						1
						3
						1

## Sheet: scc4-m35
						747								123								2								2								2								5
																						1								84								10								1
						56								6								20								26								1
						47								7								1								2								2
						41								6								7								16								8
						85																11								1								13
						3																2								11								1

## Sheet: Scc4
						812								137								2
																						1
						1
														1

[truncated: 3 more sheets: iml3-mn, cnn1d, nkp1d]
