# Supplementary material for: The kinetochore prevents centromere-proximal crossover recombination during meiosis
Source: eLife. 2015 Dec 14;4:e10850. doi: 10.7554/eLife.10850 (PMC4749563; doi:10.7554/eLife.10850)
Supplement: Supplementary file 3. — Source data used to generate Figure 2 and Figure 2—figure supplement 2. DOI: http://dx.doi.org/10.7554/eLife.10850.021 [file elife-10850-supp3.xlsx]

## Sheet: events_per_tetrad
Wild type													pCLB2-3HA-IML3
Tetrad#	E1	E2	E3	E4	E5	E6	E7	total NCO	total Simple CO	total JM events	Total Events		Tetrad#	E1	E2	E3	E4	E5	E6	E7	total NCO	total Simple CO	total JM events	Total Events
1	51	77	9	1	6	8	2	52	86	102	154		1	31	98	8	3	2	3	0	34	106	111	145
2	35	83	8	2	3	11	1	37	91	106	143		2	45	71	3	2	4	7	1	47	74	86	133
3	40	79	13	2	4	6	0	42	92	102	144		3	42	74	12	2	3	3	1	44	86	93	137
4	33	94	8	0	2	6	0	33	102	110	143		4	36	91	14	1	4	7	0	37	105	116	153
5	47	86	12	2	8	7	1	49	98	114	163		5	28	73	5	3	5	5	0	31	78	88	119
6	35	95	9	0	8	10	0	35	104	122	157		6	24	69	4	2	2	3	0	26	73	78	104
7	39	63	2	0	3	9	1	39	65	78	117		7	30	77	12	2	2	7	1	32	89	99	131
8	37	79	9	1	2	9	1	38	88	100	138		8	37	73	4	0	0	9	2	37	77	88	125
9	35	76	12	3	3	10	0	38	88	101	139		Total	273	626	62	15	22	44	5	288	688	759	1047
10	29	85	12	0	1	11	0	29	97	109	138		Mean	34.1	78.2	7.8	1.9	2.8	5.5	0.6	36	86	94.9	130.9
11	40	82	10	1	3	10	1	41	92	106	147		Median	33.5	73.5	6.5	2	2.5	6	0.5	35.5	82	90.5	132
12	34	85	9	1	3	12	0	35	94	109	144		SD	7.2	10.5	4.4	1	1.6	2.3	0.7	6.9	13.2	13	15.3
13	38	76	14	0	2	8	0	38	90	100	138		SE	2.5	3.7	1.5	0.4	0.6	0.8	0.3	2.4	4.7	4.6	5.4
14	30	76	7	0	1	9	1	30	83	94	124
15	38	83	8	1	3	12	1	39	91	107	146
16	25	73	3	3	7	7	0	28	76	90	118
17	37	77	6	1	4	1	0	38	83	88	126
18	33	70	5	3	1	2	0	36	75	78	114		Summary
19	31	66	8	2	9	2	1	33	74	86	119
20	33	84	3	0	2	0	1	33	87	90	123		Crossovers per tetrad
21	26	81	3	0	3	8	0	26	84	95	121			wild type	pCLB2-IML3
22	40	71	7	2	4	4	2	42	78	88	130		avgCO/tetrad	94.5	94.9
23	31	55	13	1	5	4	1	32	68	78	110		avgCO/tetrad_STD	10.3	13
24	39	82	11	0	1	3	0	39	93	97	136		n	52	8
25	29	77	7	2	5	5	1	31	84	95	126
26	31	76	11	1	3	1	0	32	87	91	123		two-tailed p value 0.9217
27	30	79	4	0	1	5	1	30	83	90	120
28	36	73	5	0	4	2	2	36	78	86	122
29	24	77	11	1	2	2	0	25	88	92	117		Non-crossovers per terad
30	40	84	12	2	1	3	0	42	96	100	142			wild type	pCLB2-IML3
31	27	81	11	0	5	3	1	27	92	101	128		avgNCO/tetrad	36.4	36
32	46	65	9	4	1	3	2	50	74	80	130		avgNCO/tetrad_STD	7.6	6.9
33	46	71	4	0	0	5	1	46	75	81	127		n	52	8
34	47	86	10	0	3	6	1	47	96	106	153
35	33	74	8	0	2	2	0	33	82	86	119		two-tailed p value =0.8891
36	38	73	6	1	1	0	0	39	79	80	119
37	39	82	12	2	2	5	1	41	94	102	143		Unpaired t test
38	22	80	10	1	4	1	0	23	90	95	118
39	28	82	5	0	4	3	0	28	87	94	122
40	26	78	8	0	2	1	0	26	86	89	115
41	34	68	5	1	6	1	0	35	73	80	115
42	35	55	10	1	4	2	2	36	65	73	109
43	35	69	5	2	4	8	2	37	74	88	125
44	24	83	7	1	1	3	0	25	90	94	119
45	45	68	12	0	1	3	4	45	80	88	133
46	31	80	3	0	1	4	2	31	83	90	121
47	33	82	9	1	3	3	0	34	91	97	131
48	60	76	8	0	4	9	1	60	84	98	158
49	34	68	21	0	5	4	1	34	89	99	133
50	33	75	9	0	3	4	0	33	84	91	124
51	35	81	8	0	3	5	0	35	89	97	132
52	47	87	6	1	2	4	0	48	93	99	147
Total	1844	4008	437	47	165	266	36	1891	4445	4912	6803
Mean	35.5	77.1	8.4	0.9	3.2	5.1	0.7	36.4	85.5	94.5	130.8
Median	35	77.5	8	1	3	4	0.5	35.5	87	94.5	127.5
SD	7.4	8.1	3.5	1	2	3.4	0.9	7.6	8.8	10.3	13.4
SE	1	1.1	0.5	0.1	0.3	0.5	0.1	1.1	1.2	1.4	1.9

## Sheet: NCO&COs_within_20kb
							NCOs on all chromosomes
Non-Crossovers								NCOs
Chr	wt_<20kb	wt_>20kb	iml3_<20kb	iml3_>20kb	WT total	iml3 total		%NCO<20kb	%NCO>20kb
1	5	45	0	13	50	13	wt	2.74987	97.2501
2	3	129	0	22	132	22	iml3	7.29167	92.7083
3	6	51	2	12	57	14
4	3	228	1	30	231	31
5	5	99	1	14	104	15
6	2	42	1	5	44	6
7	2	175	0	28	177	28	Chi-Square with Yates correction
8	3	88	0	8	91	8	p=0.0001
9	5	72	2	7	77	9
10	0	106	2	11	106	13
11	4	99	4	10	103	14
12	2	153	0	29	155	29
13	2	158	0	32	160	32
14	7	112	6	14	119	20
15	3	153	2	21	156	23
16	0	129	0	11	129	11
TOTALS	52	1839	21	267	1891	288
Crossovers							COs on all chromosomes
Chr	wt_<20kb	wt_>20kb	iml3_<20kb	iml3_>20kb	WT total	iml3 total		COs
1	21	99	6	17	120	23		%CO<20kb	%CO>20kb
2	6	322	1	55	328	56	wt	2.9705	97.0295
3	17	156	2	24	173	26	iml3	4.6875	95.3125
4	3	533	1	92	536	93
5	8	238	3	34	246	37
6	8	131	1	22	139	23
7	1	435	1	61	436	62	Chi-Square with Yates correction
8	9	236	1	33	245	34	p=0.0163
9	12	192	1	31	204	32
10	3	302	1	47	305	48
11	6	266	2	41	272	43
12	12	436	6	61	448	67
13	6	350	3	57	356	60
14	18	289	3	44	307	47
15	10	412	3	59	422	62
16	6	372	1	54	378	55
Total	146	4769	36	732	4915	768

## Sheet: Events_per_chromosome
Non-Crossovers							%of total events on that chromosome that are NCOs with 20kb of CEN
Chr	wt_<20kb	wt_>20kb	iml3_<20kb	iml3_>20kb	WT total	iml3 total	NCO_WT	NCO_iml3
1	5	45	0	13	50	13	2.94118	0				CO WT	NCO WT	CO iml3mn	NCO iml3mn
2	3	129	0	22	132	22	0.652174	0
3	6	51	2	12	57	14	2.6087	5			1	12.3529	2.94118
4	3	228	1	30	231	31	0.391134	0.806452						16.6667	0
5	5	99	1	14	104	15	1.42857	1.92308
6	2	42	1	5	44	6	1.0929	3.44828			2	1.30435	0.652174
7	2	175	0	28	177	28	0.326264	0						1.28205	0
8	3	88	0	8	91	8	0.892857	0
9	5	72	2	7	77	9	1.77936	4.87805			3	7.3913	2.6087
10	0	106	2	11	106	13	0	3.27869						5	5
11	4	99	4	10	103	14	1.06667	7.01754
12	2	153	0	29	155	29	0.331675	0			4	0.391134	0.391134
13	2	158	0	32	160	32	0.387597	0						0.806452	0.806452
14	7	112	6	14	119	20	1.64319	8.95522
15	3	153	2	21	156	23	0.519031	2.35294			5	2.28571	1.42857
16	0	129	0	11	129	11	0	0						5.76923	1.92308
TOTALS	52	1839	21	267	1891	288
											6	4.37158	1.0929
														3.44828	3.44828
Crossovers											7	0.163132	0.326264
Chr	wt_<20kb	wt_>20kb	iml3_<20kb	iml3_>20kb	WT total	iml3 total								1.11111	0
1	21	99	6	17	120	23	12.3529	16.6667
2	6	322	1	55	328	56	1.30435	1.28205			8	2.67857	0.892857
3	17	156	2	24	173	26	7.3913	5						2.38095	0
4	3	533	1	92	536	93	0.391134	0.806452
5	8	238	3	34	246	37	2.28571	5.76923			9	4.27046	1.77936
6	8	131	1	22	139	23	4.37158	3.44828						2.43902	4.87805
7	1	435	1	61	436	62	0.163132	1.11111
8	9	236	1	33	245	34	2.67857	2.38095			10	0.729927	0
9	12	192	1	31	204	32	4.27046	2.43902						1.63934	3.27869
10	3	302	1	47	305	48	0.729927	1.63934
11	6	266	2	41	272	43	1.6	3.50877			11	1.6	1.06667
12	12	436	6	61	448	67	1.99005	6.25						3.50877	7.01754
13	6	350	3	57	356	60	1.16279	3.26087
14	18	289	3	44	307	47	4.22535	4.47761			12	1.99005	0.331675
15	10	412	3	59	422	62	1.7301	3.52941						6.25	0
16	6	372	1	54	378	55	1.18343	1.51515
Total	146	4769	36	732	4915	768					13	1.16279	0.387597
														3.26087	0
											14	4.22535	1.64319
														4.47761	8.95522
											15	1.7301	0.519031
														3.52941	2.35294
											16	1.18343	0
														1.51515	0

## Sheet: NCO_COs_near_CEN_STATs
2x2 Contingency Table for NCOs Close and Far Away from Cen				%NCOs		Number of NCOs
	Yates	Pearson	compared to WT	within 20kb of Cen	Outside 20kb of Cen	Within 20kb of Cen	Outside 20kb of Cen		Total NCOs
Chi Square	14.551	15.92		2.74987	97.2501	52	1839	WT	1891
iml3 P value	0.000136	<0.0001		7.29167	92.7083	21	267	iml3	288
Chi Square	0	0.02		2.81996	97.18	52	1792	zip3	1844
zip3 Pvalue	1	0.887537		4.5302	95.4698	27	569	sgs1	596
Chi Square	4.11	4.67		2.97619	97.0238	15	489	tel1	504
sgs1 Pvalue	0.0463	0.030694
Chi Squire	0.01	0.07
tel1 Pvalue	0.920344	0.791337
2x2 Contingency Table for COs Close and Far Away from Cen				%COs		Number of COs
	Yates	Pearson	compared to WT	within 20kb of Cen	Outside 20kb of Cen	within 20kb of Cen	Outside 20kb of Cen		Total COs
Chi Square	5.77	6.32		2.9705	97.0295	146	4769	WT	4915
iml3 P-value	0.016302	0.11938		4.6875	95.3125	36	732	iml3	768
Chi Square	0	0.01		3.06748	96.9325	15	474	zip3	489
zip3 P-value	1	0.920344		3.48749	96.5125	46	1273	sgs1	1319
Chi Square	0.77	0.93		2.4948	97.5052	24	938	tel1	962
sgs1 P-value	0.380217	0.334863
Chi Squire	0.49	0.65
tel1 P-value	0.483927	0.420113
